# Supplementary material for: Prognostic role of lymphocyte-to-monocyte ratio in pancreatic neuroendocrine neoplasms
Source: PubMed Central journal article supplement — Endocr Connect. 2020 Mar 11;9(4):289–98. doi: 10.1530/EC-19-0541 (PMC7159258; doi:10.1530/ec-19-0541), 2020-03-11
Supplement: supplementary_figure_1.pdf [file supplementary_figure_1.pdf]

A total of 229 pathologically confirmed pNEN cases were reviewed in our electronic medical record (from Mar. 2008 to Mar. 2018)

Excluded cases (n = 31)  
Systemic metastases (n = 4)  
Unresectable primary lesions (n = 11)  
Unresectable liver metastases (n = 16)

One hundred and ninety eight resectable pNEN cases were further evaluated

Excluded cases (n = 24)  
Blood routine tests unavailable (n = 12)  
Having infections within 2 weeks (n = 4)  
With history of malignancies (n = 6)  
Combined with hematological disorders (n = 2)

One hundred and seventy four eligible cases were included into final analysis
