# Supplementary figures and images for: Prognostic role of lymphocyte-to-monocyte ratio in pancreatic neuroendocrine neoplasms
Source: PubMed Central journal article supplement — Endocr Connect. 2020 Mar 11;9(4):289–98. doi: 10.1530/EC-19-0541 (PMC7159258; doi:10.1530/ec-19-0541), 2020-03-11

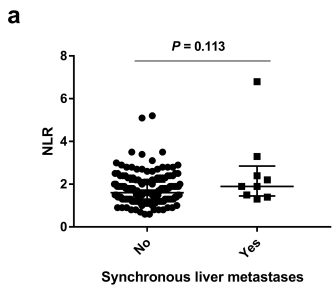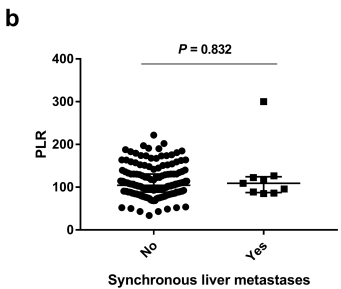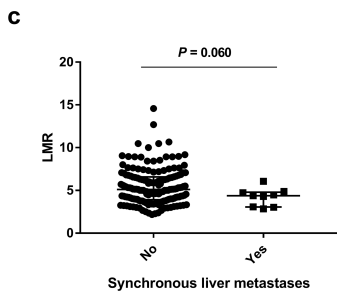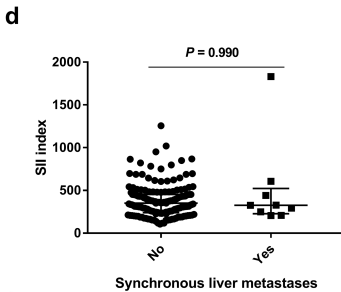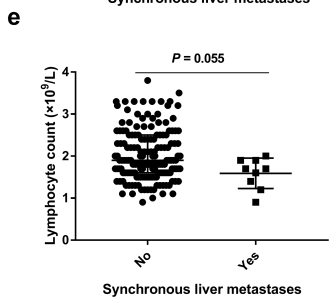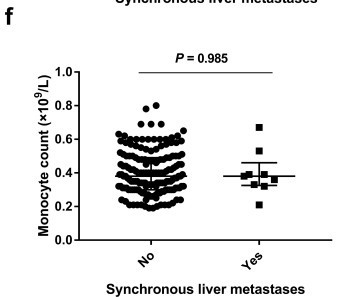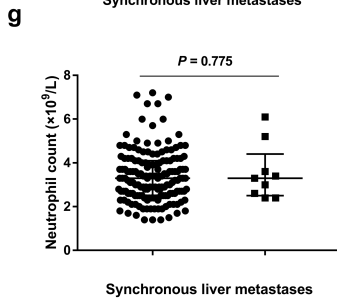

Supplement: supplementary_figure_2.pdf [file supplementary_figure_2.pdf]

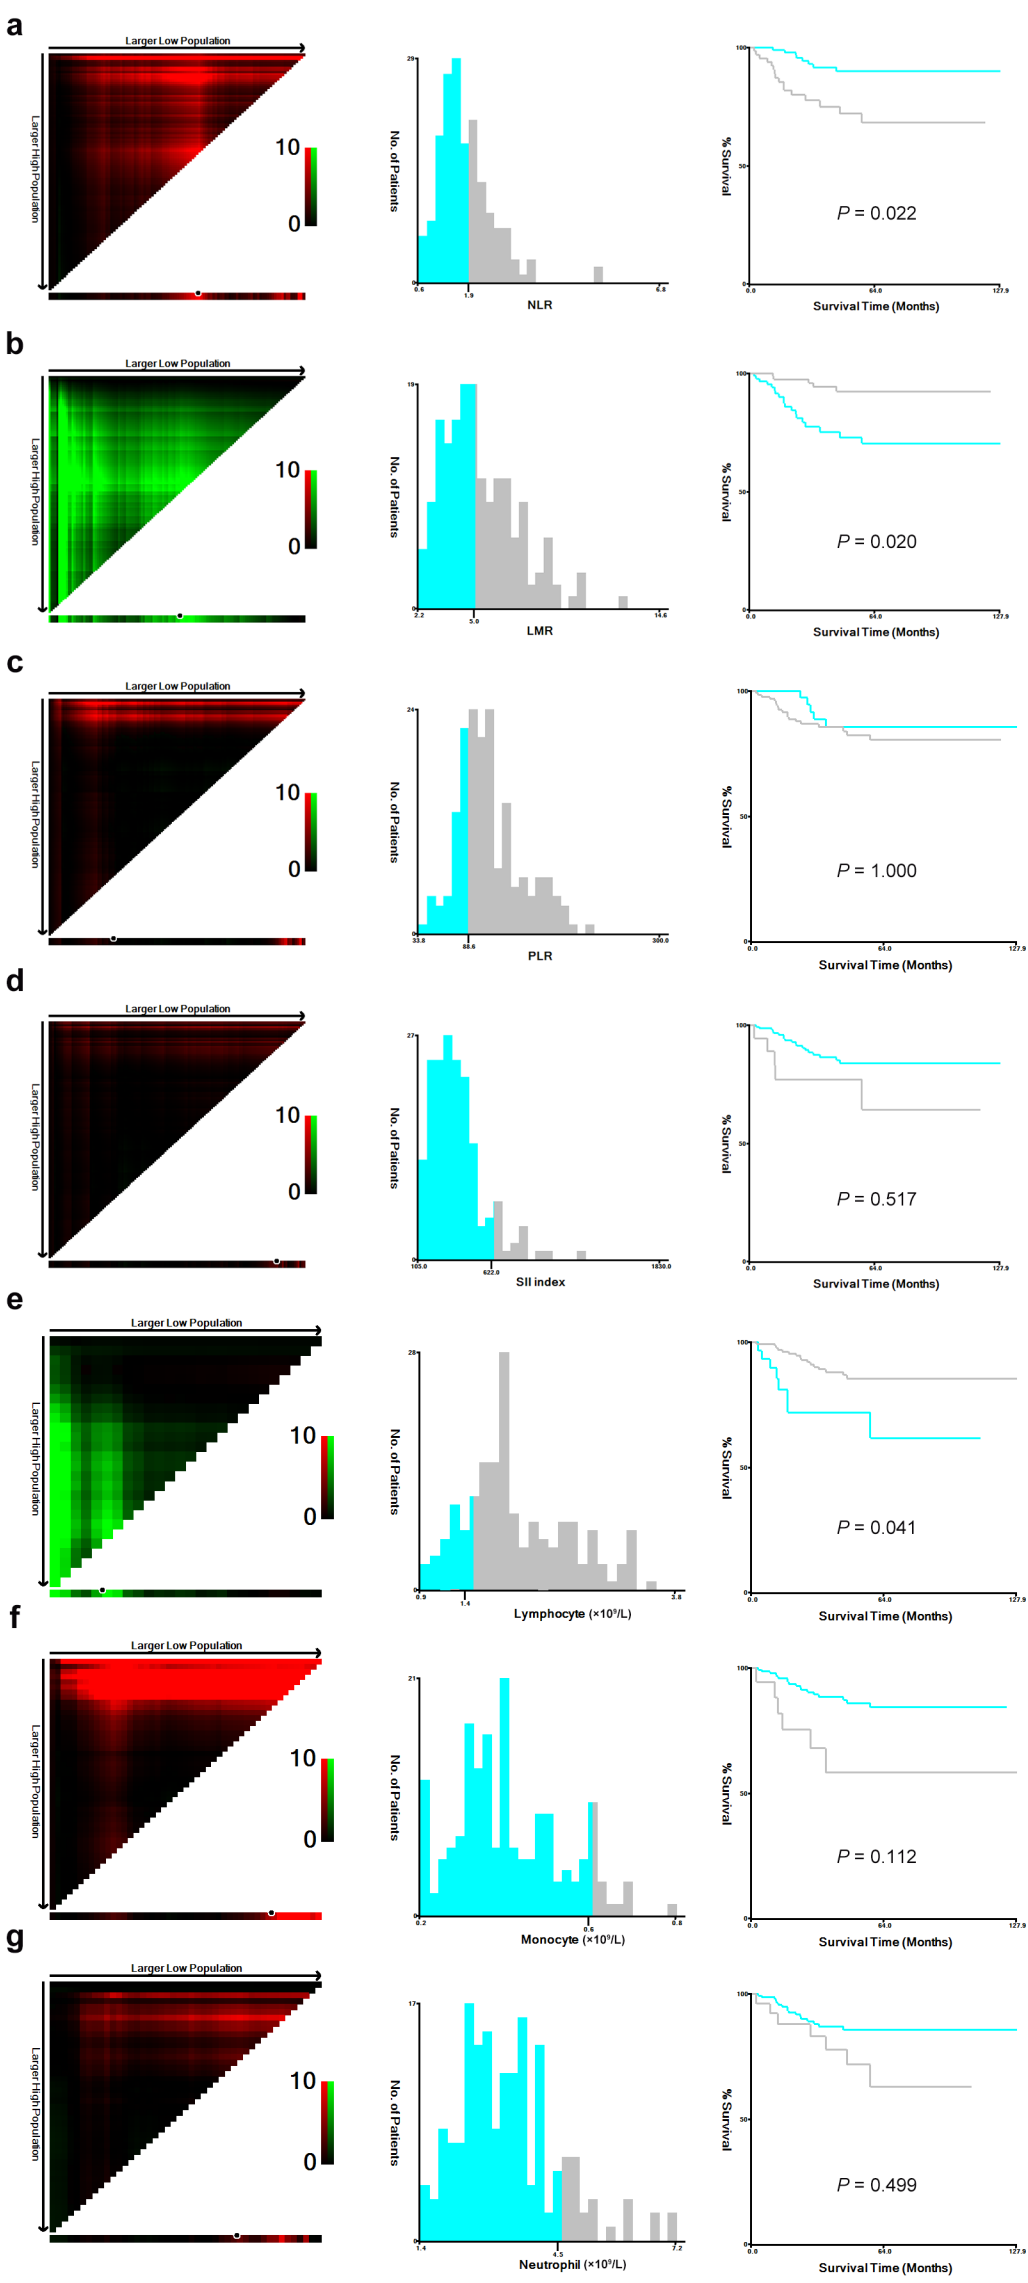

Supplement: supplementary_figure_3.pdf [file supplementary_figure_3.pdf]

**a**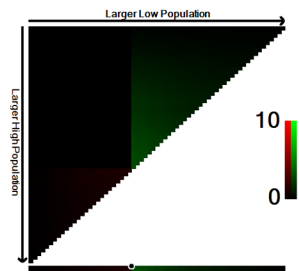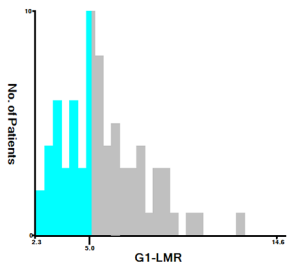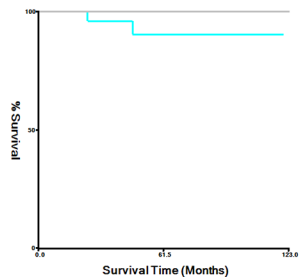**b**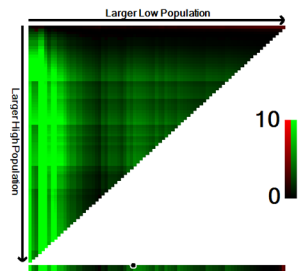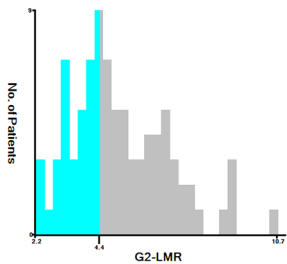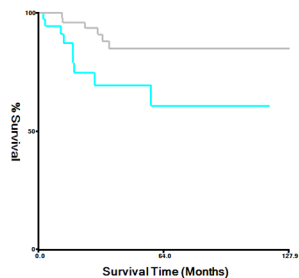**c**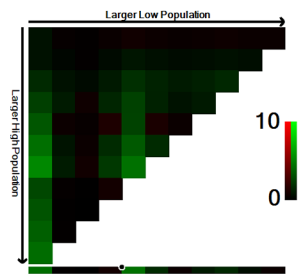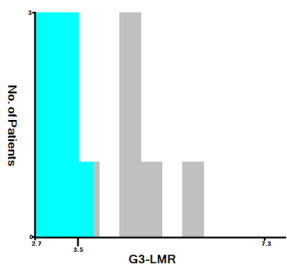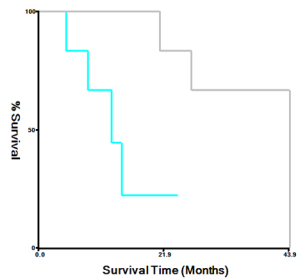

Supplement: supplementary_figure_4.pdf [file supplementary_figure_4.pdf]

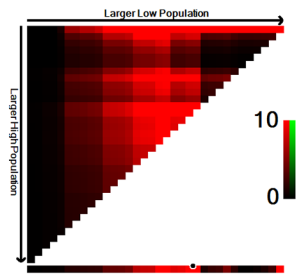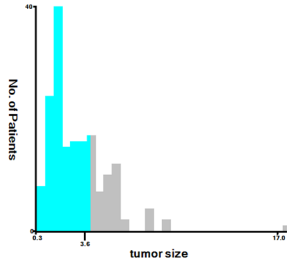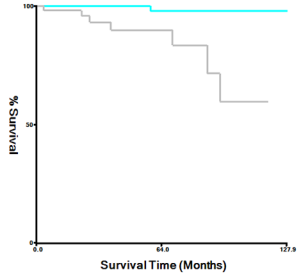

Supplement: supplementary_figure_5.pdf [file supplementary_figure_5.pdf]
